# Supplementary material for: Deep Sequencing of B Cell Receptor Repertoires From COVID-19 Patients Reveals Strong Convergent Immune Signatures
Source: PubMed Central journal article supplement (PMC7769841; doi:10.3389/fimmu.2020.605170), 2020-12-15
Supplement: DataSheet_1.pdf [file DataSheet_1.pdf]

## *Supplementary Material*

### **Deep sequencing of B cell receptor repertoires from COVID-19 patients reveals strong convergent immune signatures**

**Jacob D. Galson<sup>1\*</sup>, Sebastian Schaeztle<sup>1</sup>, Rachael J. M. Bashford-Rogers<sup>1,2</sup>, Matthew I. J. Raybould<sup>3</sup>, Aleksandr Kovaltsuk<sup>3</sup>, Gavin J. Kilpatrick<sup>1</sup>, Ralph Minter<sup>1</sup>, Donna K. Finch<sup>1</sup>, Jorge Dias<sup>1</sup>, Louisa James<sup>4</sup>, Gavin Thomas<sup>4</sup>, Wing-Yiu Jason Lee<sup>4</sup>, Jason Betley<sup>5</sup>, Olivia Cavlan<sup>1</sup>, Alex Leech<sup>1</sup>, Charlotte M. Deane<sup>3</sup>, Joan Seoane<sup>6</sup>, Carlos Caldas<sup>7</sup>, Daniel J. Pennington<sup>4</sup>, Paul Pfeffer<sup>4</sup>, Jane Osbourn<sup>1</sup>**

<sup>1</sup> Alchemab Therapeutics Ltd, London, United Kingdom

<sup>2</sup> Wellcome Centre for Human Genetics, Oxford, United Kingdom

<sup>3</sup> Oxford Protein Informatics Group, Department of Statistics, University of Oxford, Oxford, United Kingdom

<sup>4</sup> Barts and The London School of Medicine and Dentistry, Queen Mary University of London, London, United Kingdom

<sup>5</sup> Illumina, Inc., Illumina Centre, Cambridge, United Kingdom

<sup>6</sup> Translational Research Program, Vall d'Hebron Institute of Oncology, Barcelona, Spain

<sup>7</sup> Cancer Research UK Cambridge Institute and Department of Oncology, Li Ka Shing Centre, University of Cambridge, Cambridge, United Kingdom

**\* Correspondence:**

Jacob D. Galson

[jake@alchemab.com](mailto:jake@alchemab.com)

**Keywords: COVID-19, SARS-CoV-2, B-cell repertoire, BCR, antibody, convergence**

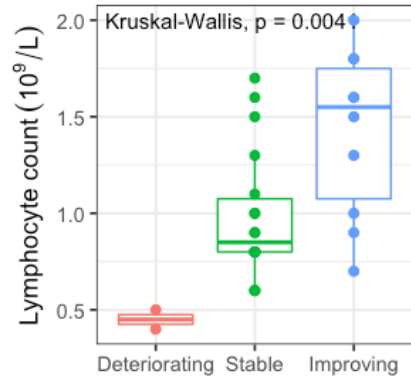

**Supplementary Figure 1.** Relationship between lymphocyte count and clinical status.

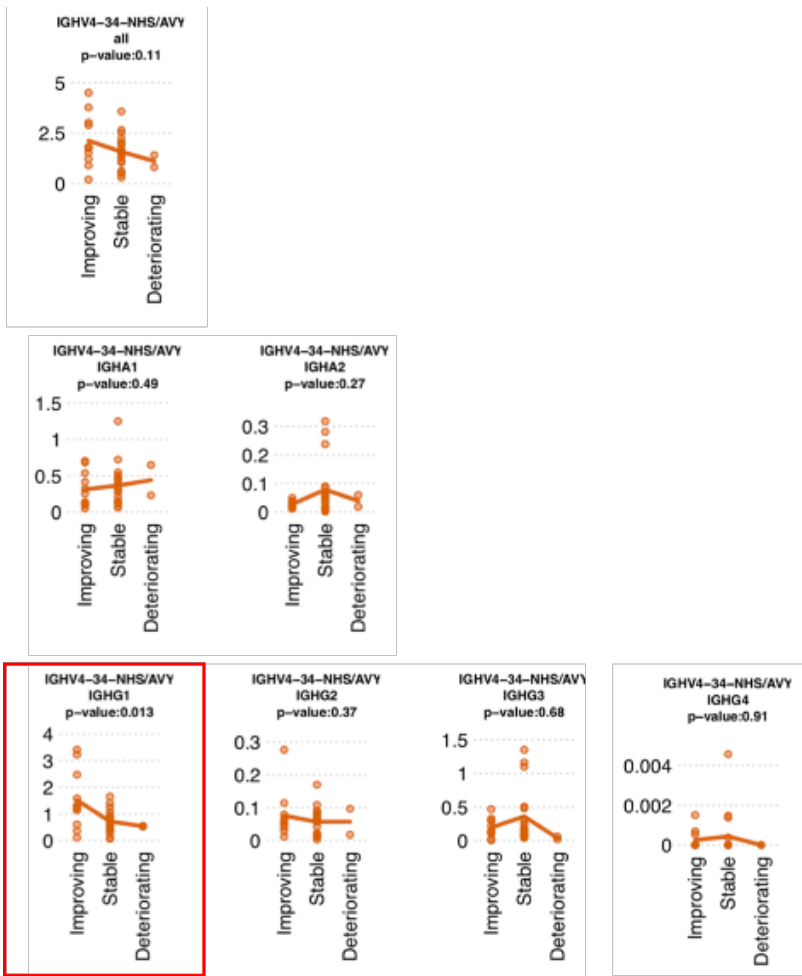

**Supplementary Figure 2.** The percentage of sequences containing the autoreactive “NHS and “AVY” motifs between COVID patients with improving, stable or worsening symptoms. IGHG1 (red box) was the only significant correlation. P-values are determined by MANOVA.

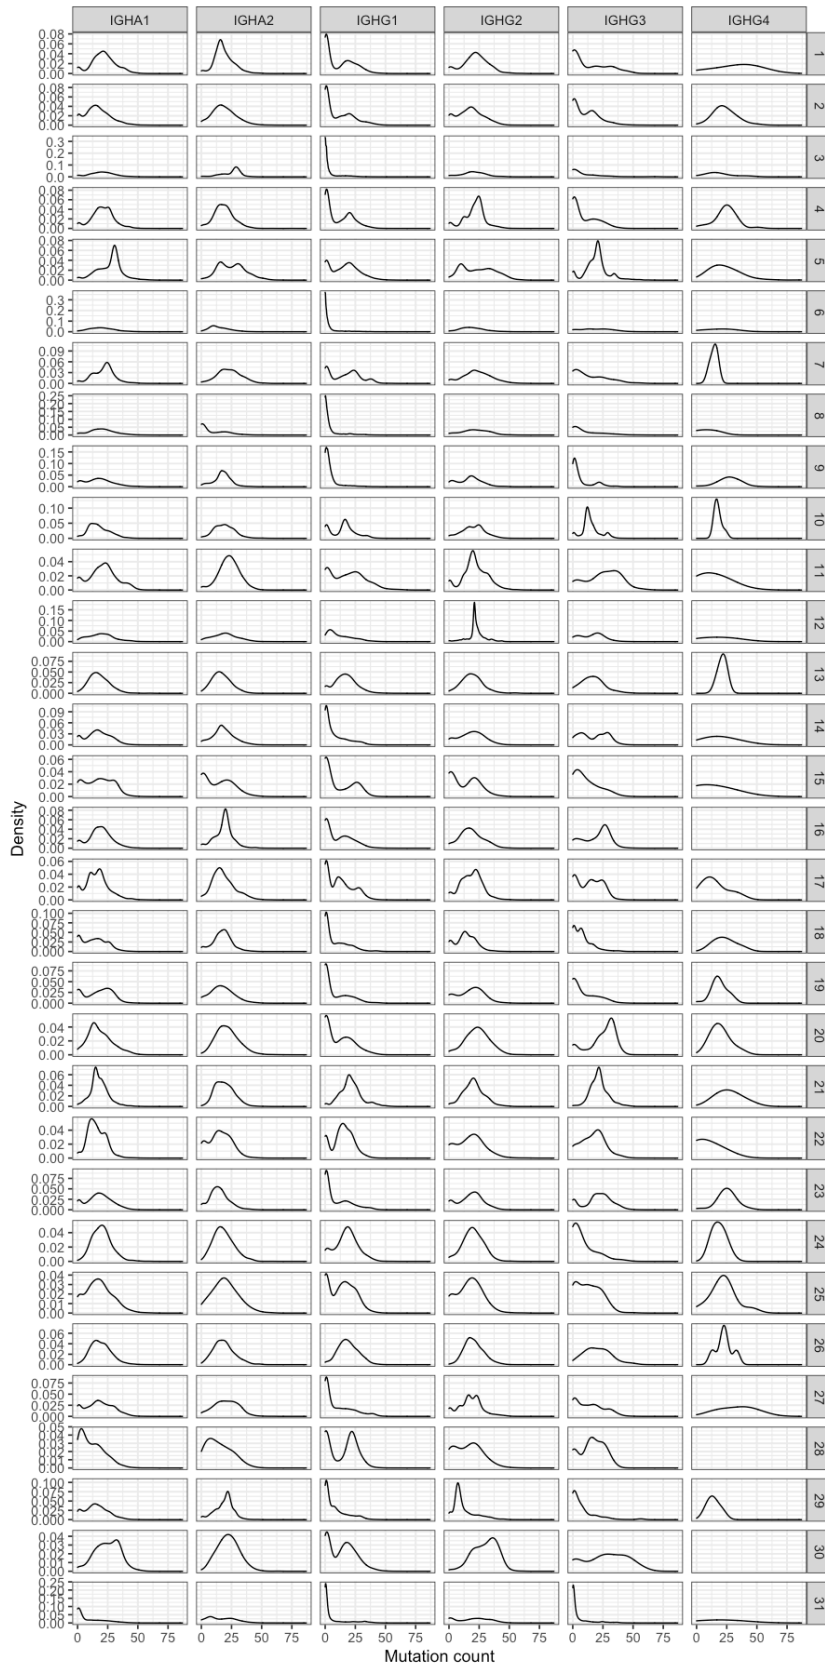

**Supplementary Figure 3.** Distribution of sequences with different numbers of mutations from germline. Each row is a different COVID-19 patient.

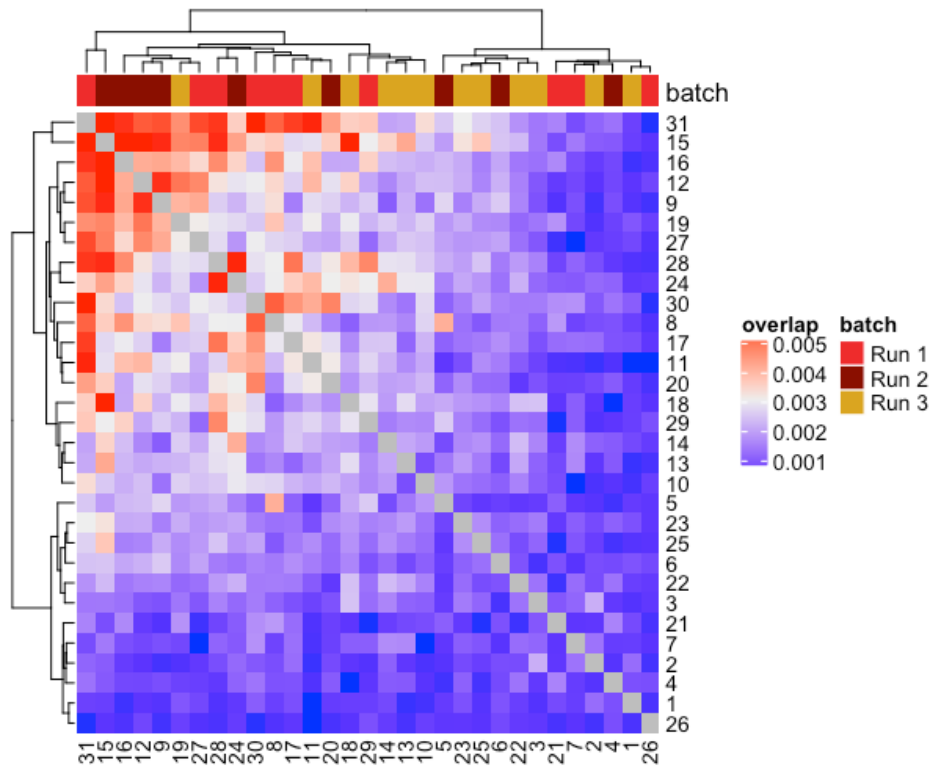

**Supplementary Figure 4.** Analysis of batch effects between the three sequencing runs. To normalise for different sequence numbers for each sample, a random subsample of 10,000 sequences per sample was taken. The clonotype convergence between each sample was then calculated using the jaccard index. Samples are hierarchically clustered in the heatmap based on this jaccard index.

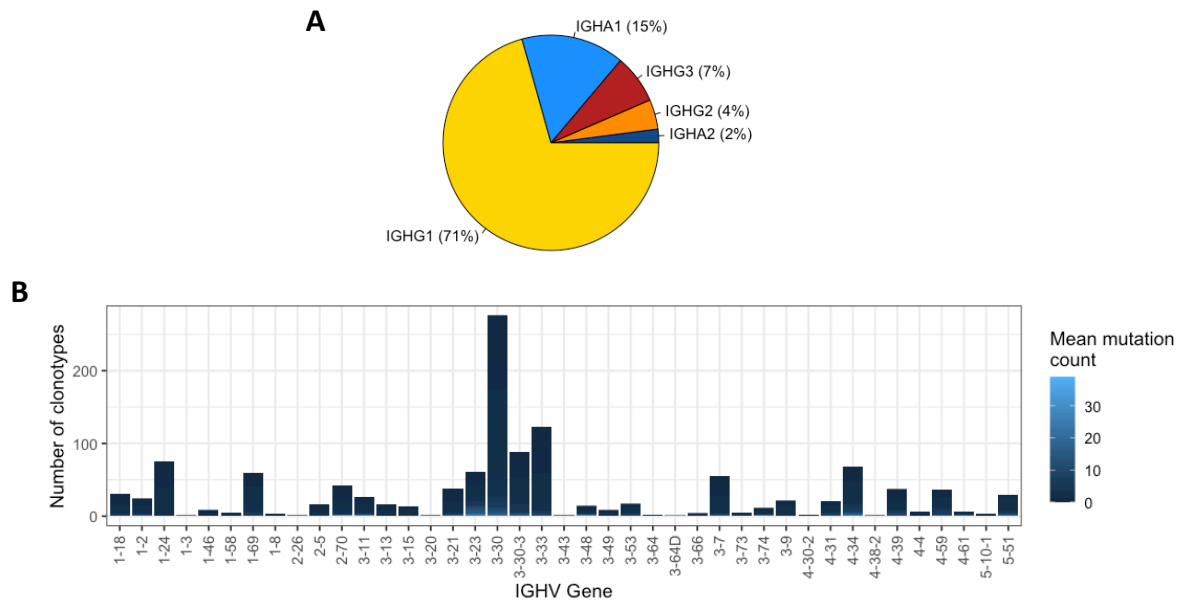

**Supplementary Figure 5.** Properties of the 1,254 convergent clonotypes **(A)** Isotype subclass usage of the sequences with the 1,254 convergent clonotypes. **(B)** IGHV gene segment usage of the 1,254 convergent clonotypes.

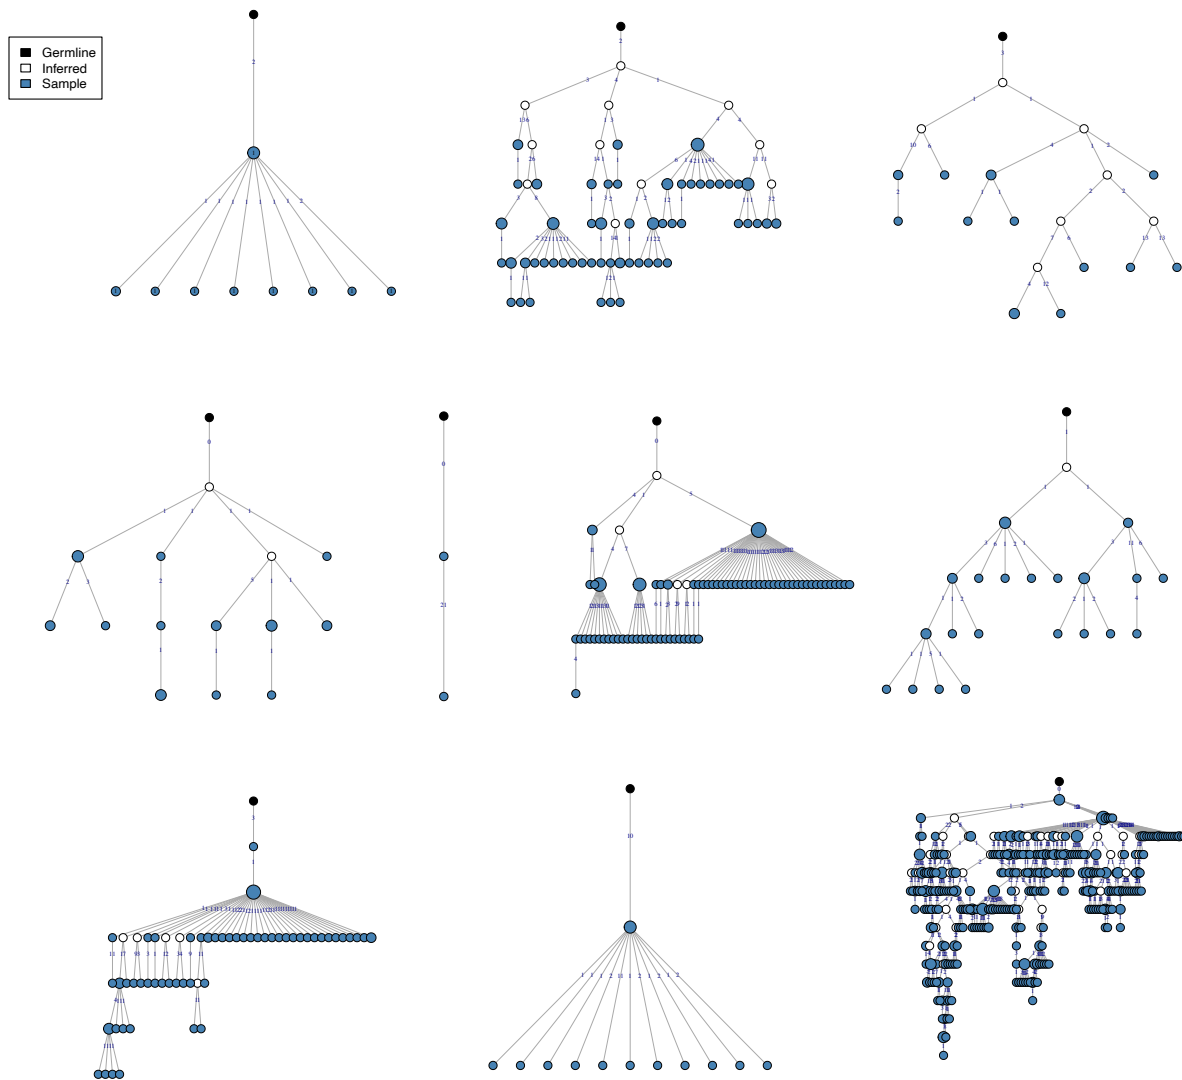

**Supplementary Figure 6.** Lineage trees of the convergent clonotype that matched to the bronchoalveolar lavage fluid data. Each lineage tree represents the members of the clonotype from each of the ten patients it was present in. Each node represents a unique sequence within the clonotype lineage tree, with the size indicative of the number of duplicate sequences present. Numbers on the edges of adjoining nodes show the number of mutations between the sequences.

**Supplementary Table 1.** Summary of number of unique sequences, and number of clonotypes obtained for each COVID-19 patient.

| Participant ID | Gender | Age | Status        | Unique BCR Sequences | Clonotypes |
|----------------|--------|-----|---------------|----------------------|------------|
| 1              | Female | 48  | Improving     | 184,613              | 30,438     |
| 2              | Male   | 44  | Stable        | 287,865              | 60,806     |
| 3              | Male   | 66  | Improving     | 169,645              | 21,928     |
| 4              | Male   | 71  | Improving     | 210,148              | 24,243     |
| 5              | Male   | 86  | Stable        | 235,013              | 34,368     |
| 6              | Female | 63  | Stable        | 122,610              | 13,366     |
| 7              | Female | 82  | Improving     | 217,356              | 21,004     |
| 8              | Female | 69  | Stable        | 123,741              | 16,296     |
| 9              | Female | 57  | Improving     | 194,778              | 20,779     |
| 10             | Male   | 69  | Stable        | 202,162              | 17,103     |
| 11             | Male   | 69  | Improving     | 152,272              | 17,144     |
| 12             | Male   | 65  | Improving     | 121,320              | 12,089     |
| 13             | Female | 33  | Deteriorating | 47,901               | 15,556     |
| 14             | Male   | 40  | Stable        | 257,725              | 53,649     |
| 15             | Male   | 55  | Stable        | 33,124               | 9,668      |
| 16             | Male   | 78  | Stable        | 37,168               | 10,828     |
| 17             | Female | 70  | Stable        | 198,822              | 20,332     |
| 18             | Male   | 39  | Improving     | 233,408              | 26,604     |
| 19             | Male   | 36  | Improving     | 51,346               | 22,354     |
| 20             | Male   | 52  | Stable        | 39,325               | 9,475      |
| 21             | Male   | 76  | Deteriorating | 221,975              | 18,588     |
| 22             | Female | 71  | Stable        | 54,684               | 9,327      |
| 23             | Male   | 26  | Stable        | 202,995              | 41,493     |
| 24             | Female | 87  | Stable        | 31,049               | 6,842      |
| 25             | Male   | 29  | Stable        | 41,025               | 14,840     |
| 26             | Male   | 49  | Stable        | 171,278              | 21,689     |
| 27             | Male   | 35  | Stable        | 280,496              | 36,937     |
| 28             | Female | 59  | Stable        | 29,641               | 8,797      |
| 29             | Female | 42  | Stable        | 253,163              | 35,211     |
| 30             | Male   | 37  | Improving     | 60,364               | 15,180     |
| 31             | Male   | 40  | Improving     | 329,223              | 78,400     |
| <b>Total:</b>  |        |     |               | 4,796,235            | 745,334    |



**Supplementary Table 2.** Summary of number of unique sequences, and number of clonotypes obtained for each healthy control subject. Only IGHA and IGHG data are included.

| Participant ID | Gender | Age | Unique BCR Sequences | Clonotypes |
|----------------|--------|-----|----------------------|------------|
| Co_C.001.2_PB  | Male   | 39  | 7,820                | 4,426      |
| Co_C.002.1_PB  | Male   | 35  | 43,813               | 12,481     |
| Co_C.003.1_PB  | Male   | 26  | 5,981                | 4,148      |
| Co_C.004.1_PB  | Female | 27  | 10,098               | 5,203      |
| Co_C.005.1_PB  | Female | 26  | 27,345               | 9,238      |
| Co_C.012.1_PB  | Female | 26  | 17,204               | 12,198     |
| Co_C.013.1_PB  | Female | 24  | 9,201                | 5,080      |
| Co_C.016.3_PB  | Female | 25  | 8,792                | 3,991      |
| Co_C.017.2_PB  | Male   | 41  | 13,720               | 7,293      |
| Co_C.018.1_PB  | Male   | 33  | 6,079                | 4,268      |
| Co_C.020.1_PB  | Female | 28  | 8,127                | 2,540      |
| Co_C.025.1_PB  | Male   | 30  | 56,489               | 18,265     |
| Co_C.026.1_PB  | Female | 29  | 40,625               | 18,091     |
| Co_C.033.2_PB  | Female | 15  | 21,652               | 5,194      |
| Co_C.038.1_PB  | Female | 26  | 46,079               | 17,419     |
| Co_C.040.1_PB  | Male   | 20  | 140,640              | 27,263     |
| Co_C.042.1_PB  | Female | 31  | 85,509               | 18,822     |
| Co_C.045.1_PB  | Female | 51  | 35,540               | 8,038      |
| Co_C.046.1_PB  | Female | 11  | 70,534               | 24,515     |
| Co_C.047.1_PB  | Female | 18  | 148,395              | 20,784     |
| Co_C.048.1_PB  | Female | 45  | 65,230               | 13,277     |
| Co_C.049.1_PB  | Female | 25  | 97,538               | 23,486     |
| Co_C.051.1_PB  | Male   | 22  | 1,376                | 1,074      |
| Co_C.052.1_PB  | Male   | 15  | 9,466                | 4,126      |
| Co_C.055.1_PB  | Male   | 43  | 8,061                | 3,894      |
| Co_C.056.1_PB  | Female | 30  | 9,048                | 4,659      |
| Co_C.060.1_PB  | Male   | 31  | 34,139               | 10,322     |
| Co_C.061.1_PB  | Male   | 36  | 12,578               | 6,016      |
| Co_C.062.1_PB  | Female | 14  | 1,709                | 1,134      |
| Co_C.063.1_PB  | Male   | 20  | 15,348               | 6,424      |
| Co_C.065.1_PB  | Female | 23  | 37,262               | 9,525      |
| Co_C.076.1_PB  | Female | 34  | 7,068                | 2,792      |
| Co_C.077.1_PB  | Female | 26  | 18,637               | 3,726      |
| Co_C.078.1_PB  | Female | 26  | 15,383               | 3,505      |
| Co_P.166.1_PB  | Female | 36  | 40,549               | 7,489      |
| Co_P.170.1_PB  | Female | 45  | 41,564               | 14,183     |
| Co_P.178.1_PB  | Female | 34  | 13,803               | 3,767      |
| Co_P.190.1_PB  | Female | 11  | 4,565                | 2,245      |
| Co_P.191.1_PB  | Male   | 18  | 5,789                | 2,705      |
| Co_P.197.1_PB  | Female | 15  | 99,308               | 19,654     |
| <b>Total:</b>  |        |     | 1,342,064            | 373,260    |

**Supplementary Table 3.** CDRH3 AA sequences identified from bronchoalveolar RNAseq data. Highlighted in green is the one identified in our SARS-CoV-2 patient dataset.

| <b>bestVHit</b>   | <b>bestJHit</b> | <b>aaSeqCDR3</b>       |
|-------------------|-----------------|------------------------|
| <b>IGHV2-26</b>   | IGHJ3           | CARDSGRHLGPFDIW        |
| <b>IGHV1-2</b>    | IGHJ3           | CATPYYYDGGLDAFDIW      |
| <b>IGHV3-74</b>   | IGHJ5           | CARDLSRTNWFDPW         |
| <b>IGHV3-15</b>   | IGHJ4           | <b>CTTDLHDYGDSDYW</b>  |
| <b>IGHV3-15</b>   | IGHJ4           | CTTDFGGMITFGGVLRR      |
| <b>IGHV3-21</b>   | IGHJ4           | CARAQSRGGYDSFFDFW      |
| <b>IGHV3-21</b>   | IGHJ4           | CGRGGPGTGIDYW          |
| <b>IGHV4-59</b>   | IGHJ5           | CARGGQYNNWFAPW         |
| <b>IGHV3-74</b>   | IGHJ5           | CVRDLRTNWFDPW          |
| <b>IGHV3-15</b>   | IGHJ4           | YTRDLHDYGDSDYW         |
| <b>IGHV3-23</b>   | IGHJ3           | CAKIPSFLSDYDVHPNDAIDIW |
| <b>IGHV5-10-1</b> | IGHJ4           | CARHPQGAQFSNLGTYFDYW   |
| <b>IGHV4-59</b>   | IGHJ4           | CARDGEYGGGLAMW         |
| <b>IGHV5-51</b>   | IGHJ6           | CARPGTYDILTGYSNHGMDVW  |
| <b>IGHV4-39</b>   | IGHJ5           | CARHASFRGTNYNWFDPW     |
| <b>IGHV3-53</b>   | IGHJ5           | CARDTSTEDVAWWFDPW      |

**Supplementary Table 4.** Convergent clonotypes with high CDRH3 homology to antibodies in the CoV-AbDab. Name: ID of the sequence. Black text represents the convergent clonotypes from this study, and blue text represent antibodies from CoV-AbDab. Highlighted in yellow are those which would be considered to belong to the same clonotype and are represented in Table 1. CDRH3: CDRH3 amino acid sequence. Green residues represent sequence matches between the convergent clonotype and the CoV-AbDab sequence, and red residues represent mismatches. IGHV: IGHV gene segment of the sequence. Green text represents matches between the convergent clonotype and the CoV-AbDab query sequence, and red text represents mismatches. IGHJ: IGHJ gene segment of the sequence. Green text represents matches between the convergent clonotype and the CoV-AbDab query sequence, and red text represents mismatches. ND – not determined. Binds/Neutralises: Experimental confirmation of whether the sequence binds SARS-CoV-1 or SARS-CoV-2.

| Name        | CDRH3                 | IGHV   | IGHJ | Binds        | Neutralises | Reference             |
|-------------|-----------------------|--------|------|--------------|-------------|-----------------------|
| C154        | AKQ-AGPYCSGGSCYSAPFDY | 3-30   | 4    | CoV-1, CoV-2 | CoV-2       | Robbiani et al., 2020 |
| ALC_3983948 | AKV-SGPYCSGGSCYSFYFDY | 3-30   | 4    |              |             |                       |
| ALC_4259294 | AKMGGGPYCSGGSCYSNYFDY | 3-30   | 4    |              |             |                       |
| COV2-2901   | ARSDILTGYRDAFDI       | 3-53   | 3    | CoV-2        |             | Zost et al., 2020     |
| COV2-2068   | ARSDILTGYRDAFDI       | 3-53   | 3    | CoV-2        | CoV-2       |                       |
| COV2-2767   | ARSDILTGYRDAFDI       | 3-53   | 3    | CoV-2        |             |                       |
| COV2-2790   | ARSDILTGYRDAFDI       | 3-53   | 3    | CoV-2        | CoV-2       |                       |
| ALC_2318471 | VRNYDILTGYSDAFDI      | 3-53   | 3    |              |             |                       |
| COV2-2007   | AKVSATYYYYYYGMDV      | 3-30   | 6    | CoV-1, CoV-2 |             | Zost et al., 2020     |
| CC12.17     | AKSSGSYYYYYYGMDV      | 3-30   | 6    | CoV-2        | CoV-2       | Rogers et al., 2020   |
| ALC_2318830 | AKVMTYYYYYYGMDV       | 3-30   | 6    |              |             |                       |
| REGN10977   | ARTPFYYDSSGYLDY       | 1-69   | 4    | CoV-2        | CoV-2       | Hansen et al., 2020   |
| COVA2-14    | ARVR-YYDSSGYEDY       | 1-69   | 4    | CoV-1, CoV-2 |             | Brouwer et al., 2020  |
| ALC_1780442 | ARYD-YYDSSGYLDY       | 1-69   | 4    |              |             |                       |
| COV2-2270   | AITYYDSSGYWDD         | 1-69   | 4    | CoV-1, CoV-2 |             | Zost et al., 2020     |
| ALC_1781971 | ASTYYDSSGYWFDY        | 1-69   | 4    |              |             |                       |
| COVA2-40    | AGRYCSGGRCGWFDP       | 4-4    | 5    | CoV-2        |             | Brouwer et al., 2020  |
| ALC_1784026 | ESRYCSGGSCGWFDP       | 4-4    | 5    |              |             |                       |
| COV2-2147   | ARSTSGSYYYGMDV        | 3-30-3 | 6    | CoV-1, CoV-2 |             | Zost et al., 2020     |
| COV2-2341   | ARSTSGSYYYGMDV        | 3-30-3 | 6    | CoV-1, CoV-2 |             |                       |
| COV2-2160   | ARSTSGSYYYGMDV        | 3-30-3 | 6    | CoV-1, CoV-2 |             |                       |
| COV2-2159   | ARSTSGSYYYGMDV        | 3-30-3 | 6    | CoV-1, CoV-2 |             |                       |
| CV27        | ARSEGGSYYYGMDV        | 3-30   | 6    | CoV-2        |             | Seydoux et al., 2020  |
| CV34        | ARSYGGSYYYGMDV        | 3-30-3 | 6    | CoV-2        |             |                       |
| ALC_1248726 | ARAYSYSYYYGMDV        | 3-53   | 6    |              |             |                       |
| ALC_1249094 | ARGTRGSYYYGMDV        | 3-30-3 | 6    |              |             |                       |
| ALC_1255857 | ARGFSGSYYYGMDV        | 3-53   | 6    |              |             |                       |
| ALC_1251900 | ARAYSYSYYYGMDV        | 3-7    | 6    |              |             |                       |
| COV2-2639   | ARAGGGSYRGPFDY        | 3-30   | 4    | CoV-1, CoV-2 |             |                       |
| 2M-14E5     | ARSGGGSYRGPFDY        | 3-30   | 4    | CoV-2        |             |                       |
| ALC_1245591 | ARVIGGSYRGPFDY        | 3-30-3 | 4    |              |             |                       |
| COV2-2006   | ARPSGGYYAPLDY         | 3-30-3 | 4    | CoV-1, CoV-2 |             | Zost et al., 2020     |

Supplementary Material

|             |                               |               |          |              |              |                       |
|-------------|-------------------------------|---------------|----------|--------------|--------------|-----------------------|
| ALC_1246650 | <b>ARPYSGSYAPLDY</b>          | <b>3-30-3</b> | <b>4</b> |              |              |                       |
| S304        | ARGDSSGYYYYFDY                | 3-13          | 4        | CoV-1, CoV-2 | CoV-1, CoV-2 | Pinto et al., 2020    |
| ALC_1245048 | <b>ARGYSSGYYYYFDY</b>         | <b>3-13</b>   | <b>4</b> |              |              |                       |
| COV2-2027   | AIYGYYYYGLDV                  | 3-30          | 6        | CoV-2        |              | Zost et al., 2020     |
| ALC_480504  | <b>AVYGYYYGMDV</b>            | <b>3-30</b>   | <b>6</b> |              |              |                       |
| ALC_481016  | <b>ASGYYYGMDV</b>             | <b>3-30-3</b> | <b>6</b> |              |              |                       |
| COVA2-04    | ARDLERAGGMDV                  | 3-53          | 6        | CoV-2        | CoV-2        | Brouwer et al., 2020  |
| ALC_498298  | <b>ARDLEAAGGMDV</b>           | <b>3-66</b>   | <b>6</b> |              |              |                       |
| CA1         | AREGYCSGGSCSYGYYYYGMDV        | 1-18          | 6        | CoV-2        | CoV-2        | Shi et al., 2020      |
| ALC_4634307 | <b>AREGYCSGGSCYTDYYYYGMDV</b> | <b>3-7</b>    | <b>6</b> |              |              |                       |
| ALC_4258298 | <b>ARDTYCSGGSCY--YYYYGMDV</b> | <b>3-7</b>    | <b>6</b> |              |              |                       |
| COV2-2445   | ARRRSSRYSSGWYMYYYMDV          | 3-33          | 6        | CoV-2        |              |                       |
| COV2-2173   | ARRRSSRYSSGWYMYYYMDV          | 3-20          | 6        | CoV-2        |              | Zost et al., 2020     |
| COV2-2191   | ARRRSSRYSSGWYMYYYMDV          | 3-20          | 6        | CoV-2        |              |                       |
| ALC_4259233 | <b>ARDVSSSWYSSGWY-YYYYMDV</b> | <b>3-7</b>    | <b>6</b> |              |              |                       |
| COVA1-19    | ARWKS-DYYDSSGYPAAFDI          | 3-21          | 3        | CoV-2        |              | Brouwer et al., 2020  |
| ALC_4259226 | <b>ARWRRTYYDSSGYPDAFDI</b>    | <b>3-21</b>   | <b>3</b> |              |              |                       |
| C150        | ARPTAVAAAGNYFYYYGMDV          | 3-74          | 6        | CoV-2        |              | Robbiani et al., 2020 |
| ALC_3663937 | <b>ARDSGVAAAGNY-YYGMDV</b>    | <b>3-7</b>    | <b>6</b> |              |              |                       |
| 12E         | ARVGYYGDYAWGYYYYGMDV          | 1-18          | 6        | CoV-1        | CoV-1        | WO2005060520          |
| ALC_3293962 | <b>ARH--YGDYVFGYYYYGMDV</b>   | <b>4-39</b>   | <b>6</b> |              |              |                       |
| 256         | ARDGYGSGS-DYYYYYMDV           | 3-30          | 6        | CoV-1        | CoV-1        | Sui et al., 2006      |
| ALC_3985973 | <b>ARGGYGSGSYNYYYYYMDV</b>    | <b>1-69</b>   | <b>6</b> |              |              |                       |
| CV23        | ARV-WGYCSGGSCYVDAFDI          | 1-3           | 3        | CoV-2        |              | Seydoux et al., 2020  |
| ALC_3664160 | <b>ARVGLGYCSGGSCY-SAFDI</b>   | <b>4-34</b>   | <b>3</b> |              |              |                       |
| COV2-2146   | ARRSYRSSWYYYYGMDV             | 3-48          | 6        | CoV-2        |              | Zost et al., 2020     |
| COV2-2263   | ARRSYRSSWYYYYGMDV             | 3-48          | 6        | CoV-2        |              |                       |
| ALC_2822775 | <b>ARVGYSSSWYYYYGMDV</b>      | <b>1-69</b>   | <b>6</b> |              |              |                       |
| 0317-A9     | ATATAMDGYYYYYMDV              | 1-24          | 6        | CoV-2        |              | Chi et al., 2020      |
| ALC_2317864 | <b>AVNTAMD-YYYYYMDV</b>       | <b>3-21</b>   | <b>6</b> |              |              |                       |
| COV2-2844   | ARAQGGN-YYGMDV                | 3-30-3        | 6        | CoV-1, CoV-2 |              | Zost et al., 2020     |
| COV2-2564   | ARAQGGN-YYGMDV                | 3-30-3        | 6        | CoV-1, CoV-2 |              |                       |
| ALC_1782084 | <b>ARGQGGSQYYGMDV</b>         | <b>4-54</b>   | <b>6</b> |              |              |                       |
| COVA3-01    | ARGPAATYYYYMDV                | 4-59          | 6        | CoV-1, CoV-2 |              | Brouwer et al., 2020  |
| COVA3-09    | ARGPAATYYYYMDV                | 3-9           | 6        | CoV-2        |              |                       |
| ALC_1244470 | <b>ATGVAATYYYYMDV</b>         | <b>4-61</b>   | <b>6</b> |              |              |                       |
| COV2-2832   | ARGDGGYSPFDY                  | 3-66          | 4        | CoV-2        | CoV-2        | Zost et al., 2020     |
| ALC_815774  | <b>ARSRGGYSPFDY</b>           | <b>3-30-3</b> | <b>4</b> |              |              |                       |
| COV2-2919   | ARTMATINAFDI                  | 2-70          | 3        | CoV-2        | CoV-2        | Zost et al., 2020     |
| ALC_482575  | <b>ARIMATINAFDI</b>           | <b>2-70</b>   | <b>3</b> |              |              |                       |
| COV2-2178   | ARVGSSSWYFDY                  | 3-7           | 4        | CoV-1, CoV-2 |              | Zost et al., 2020     |
| ALC_482648  | <b>ARVPSSSWYFDY</b>           | <b>3-11</b>   | <b>4</b> |              |              |                       |
| C109        | AIQLWLRGGYDY                  | 3-7           | 4        | CoV-2        |              | Robbiani et al., 2020 |
| ALC_481831  | <b>AVQLWLRGGFDY</b>           | <b>4-59</b>   | <b>4</b> |              |              |                       |

|            |                       |             |          |              |       |                       |
|------------|-----------------------|-------------|----------|--------------|-------|-----------------------|
| BD-494     | ARDLVVYGM DV          | 3-53        | 6        | CoV-2        | CoV-2 | Cao et al., 2020      |
| BD-498     | ARDLVVYGM DV          | 3-53        | 6        | CoV-2        | CoV-2 |                       |
| BD-505     | ARDRVVYGM DV          | 3-53        | 6        | CoV-2        | CoV-2 |                       |
| BD-507     | ARDLVVYGM DV          | 3-53        | 6        | CoV-2        | CoV-2 |                       |
| ALC_265226 | <b>ARVLT</b> VVYGM DV | <b>3-33</b> | <b>6</b> |              |       |                       |
| BD-604     | ARDLGPYGM DV          | 3-53        | 6        | CoV-2        | CoV-2 | Du et al., 2020       |
| ALC_269736 | <b>ARGAGPY</b> GM DV  | <b>3-11</b> | <b>6</b> |              |       |                       |
| C210       | ARLDMAYGM DV          | 3-53        | 6        | CoV-2        | CoV-2 | Robbiani et al., 2020 |
| ALC_261066 | <b>ARDSTAY</b> GM DV  | <b>4-34</b> | <b>6</b> |              |       |                       |
| CV10       | ARGFDY                | 4-59        | 4        | CoV-1, CoV-2 |       | Seydoux et al., 2020  |
| ALC_7192   | <b>ARGFDY</b>         | <b>1-2</b>  | <b>4</b> |              |       |                       |
| ALC_7213   | <b>ARGFDY</b>         | <b>1-18</b> | <b>4</b> |              |       |                       |
| ALC_7353   | <b>ARGFDY</b>         | <b>5-51</b> | <b>4</b> |              |       |                       |
| ALC_7448   | <b>ARGFD</b> P        | <b>4-34</b> | <b>5</b> |              |       |                       |

**Supplementary Table 5.** Details of the 463 convergent clonotypes that matched to samples in the Nielsen *et al.* data.

| Cluster Centre CDRH3  | IGHV gene | IGHJ gene | Total Matches | Seropositive Matches | Seronegative Matches |
|-----------------------|-----------|-----------|---------------|----------------------|----------------------|
| CARRFDYW              | 3-23      | 4         | 6             | 5                    | 1                    |
| CARGFDYW              | 1-18      | 4         | 5             | 5                    | 0                    |
| CARGFDPW              | 4-34      | 5         | 5             | 5                    | 0                    |
| CARVFDYW              | 3-30      | 4         | 5             | 4                    | 1                    |
| CARVNSGSYLGAFDIW      | 3-30      | 3         | 5             | 4                    | 1                    |
| CARGFDYW              | 1-2       | 4         | 4             | 4                    | 0                    |
| CAREVLVYFDYW          | 3-33      | 4         | 4             | 4                    | 0                    |
| CARVLSYYGMDVW         | 3-23      | 6         | 4             | 4                    | 0                    |
| CARSSGYYFDYW          | 3-30      | 4         | 4             | 4                    | 0                    |
| CARVVSYYYGMDVW        | 3-21      | 6         | 4             | 4                    | 0                    |
| CARVASYYYGMDVW        | 3-23      | 6         | 4             | 4                    | 0                    |
| CTRNDFWSGYYFDYW       | 3-7       | 4         | 4             | 4                    | 0                    |
| CARTYSGSYTDAFDIW      | 3-30      | 3         | 4             | 4                    | 0                    |
| CAREGVVGATTGLDYW      | 3-30      | 4         | 4             | 4                    | 0                    |
| CARDGVVTATTGLDYW      | 3-33      | 4         | 4             | 4                    | 0                    |
| CARDRIVGGTTGLDYW      | 3-33      | 4         | 4             | 4                    | 0                    |
| CTTVVYYYDSSGYSNDAFDIW | 3-15      | 3         | 4             | 4                    | 0                    |
| CARGYSSGWYFDYW        | 3-30      | 4         | 4             | 3                    | 1                    |
| CARVPSSSWYFDYW        | 3-11      | 4         | 4             | 3                    | 1                    |
| CTTGRLW               | 3-15      | 4         | 3             | 3                    | 0                    |
| CASGFDYW              | 1-69      | 4         | 3             | 3                    | 0                    |
| CARGVDPW              | 1-2       | 5         | 3             | 3                    | 0                    |
| CARDVGAQFDYW          | 3-30      | 4         | 3             | 3                    | 0                    |
| CARDLYTFGMDVW         | 3-53      | 6         | 3             | 3                    | 0                    |
| CAVYGYYYYGMDVW        | 3-30      | 6         | 3             | 3                    | 0                    |
| CAKVRGGYYFDYW         | 3-30      | 4         | 3             | 3                    | 0                    |
| CAHRRSYYDAFDIW        | 2-5       | 3         | 3             | 3                    | 0                    |
| CTSNDFWSGYSYDW        | 3-49      | 4         | 3             | 3                    | 0                    |
| CARLGGTAWYFDLW        | 3-7       | 2         | 3             | 3                    | 0                    |
| CATDGIVGATGLDYW       | 3-33      | 4         | 3             | 3                    | 0                    |
| CAVPRGYSYGPFDYW       | 3-48      | 4         | 3             | 3                    | 0                    |
| CTRGDVWSGYWSDYW       | 3-49      | 4         | 3             | 3                    | 0                    |
| CSRPYSGSYSYFDYW       | 3-30      | 4         | 3             | 3                    | 0                    |
| CARTYSGSYSWFDPW       | 3-30-3    | 5         | 3             | 3                    | 0                    |
| CARVRSGSYDAFDIW       | 3-30-3    | 3         | 3             | 3                    | 0                    |
| CARVRGGSYGVFDYW       | 3-30      | 4         | 3             | 3                    | 0                    |
| CAKTVSGSYSPFDYW       | 3-30      | 4         | 3             | 3                    | 0                    |
| CARVPGGSYGPFDYW       | 3-30      | 4         | 3             | 3                    | 0                    |
| CARSNSGSYYHAFDIW      | 3-30-3    | 3         | 3             | 3                    | 0                    |
| CARVSSGSYFGAFDIW      | 3-30-3    | 3         | 3             | 3                    | 0                    |
| CATARAGSYYGMDVW       | 3-23      | 6         | 3             | 3                    | 0                    |
| CAKVRGGSYRDAFDIW      | 3-30      | 3         | 3             | 3                    | 0                    |
| CASSGSGSYSPFDYW       | 3-30      | 4         | 3             | 3                    | 0                    |
| CARTYSGSYGAFDIW       | 3-23      | 3         | 3             | 3                    | 0                    |
| CAKTYSGSYSSFDYW       | 3-30      | 4         | 3             | 3                    | 0                    |
| CARAYSGSYYGMDVW       | 3-7       | 6         | 3             | 3                    | 0                    |
| CARAYSGSYWAAFIDW      | 3-30      | 3         | 3             | 3                    | 0                    |
| CARGYYDSSGYNWFDPW     | 3-13      | 5         | 3             | 3                    | 0                    |

|                       |        |   |   |   |   |
|-----------------------|--------|---|---|---|---|
| CARGRTVTTLYYYYGMDVW   | 4-39   | 6 | 3 | 3 | 0 |
| CARDSVLRFDWTTYGGMDVW  | 3-11   | 6 | 3 | 3 | 0 |
| CARVGYCSSTSCSYGGMDVW  | 3-33   | 6 | 3 | 3 | 0 |
| CARGRPLDAFDIW         | 4-31   | 3 | 3 | 2 | 1 |
| CARDSTAYGMDVW         | 4-34   | 6 | 3 | 2 | 1 |
| CASVHSSSWFFDYW        | 3-7    | 4 | 3 | 2 | 1 |
| CARSGSYGPFDYW         | 3-30   | 4 | 3 | 2 | 1 |
| CAKDSYSSSWYFDYW       | 3-30   | 4 | 3 | 2 | 1 |
| CARDSGPYGGMDVW        | 3-30-3 | 6 | 3 | 2 | 1 |
| CARGFNYYDSSGFDYW      | 3-30   | 4 | 3 | 2 | 1 |
| CERDRSVCSTSCYGGMDVW   | 3-30   | 6 | 3 | 2 | 1 |
| CARGRYYYDSSGYSYGGMDVW | 1-69   | 6 | 3 | 2 | 1 |
| CATSGYW               | 1-24   | 4 | 2 | 2 | 0 |
| CTTWGGYW              | 3-15   | 4 | 2 | 2 | 0 |
| CAKGVVDVW             | 3-23   | 6 | 2 | 2 | 0 |
| CAQGLDYW              | 4-59   | 4 | 2 | 2 | 0 |
| CAMGFDDW              | 4-59   | 4 | 2 | 2 | 0 |
| CAKSDGMDVW            | 3-9    | 6 | 2 | 2 | 0 |
| CAKDVGGNYGYW          | 3-23   | 4 | 2 | 2 | 0 |
| CAREYLVLDYW           | 3-33   | 4 | 2 | 2 | 0 |
| CARTPGPYFDYW          | 3-30   | 4 | 2 | 2 | 0 |
| CARVVYDYFDYW          | 3-53   | 4 | 2 | 2 | 0 |
| CARGYRDYGDYW          | 3-33   | 4 | 2 | 2 | 0 |
| CARVLSYGGMDVW         | 4-34   | 6 | 2 | 2 | 0 |
| CARMTTVTTYDYW         | 2-70   | 4 | 2 | 2 | 0 |
| CARYSSSDFDYW          | 1-69   | 4 | 2 | 2 | 0 |
| CARAVNFGWFDPW         | 1-18   | 5 | 2 | 2 | 0 |
| CVRDWGEYFDYW          | 3-53   | 4 | 2 | 2 | 0 |
| CARGVWDLWYFDLW        | 4-34   | 2 | 2 | 2 | 0 |
| CARQQWLRGRFDYW        | 4-39   | 4 | 2 | 2 | 0 |
| CARETGSGSYPDYW        | 3-33   | 4 | 2 | 2 | 0 |
| CARVLGTYGGMDVW        | 3-30   | 6 | 2 | 2 | 0 |
| CARDLSYGDYNDYW        | 3-33   | 4 | 2 | 2 | 0 |
| CATLVDYGGMDVW         | 3-9    | 6 | 2 | 2 | 0 |
| CARGGGYGHYFDYW        | 3-30-3 | 4 | 2 | 2 | 0 |
| CVGELLPYGGMDVW        | 3-33   | 6 | 2 | 2 | 0 |
| CAVQLWLRGGFDYW        | 4-59   | 4 | 2 | 2 | 0 |
| CAKVMAGTGDYW          | 3-30   | 4 | 2 | 2 | 0 |
| CARVLPVYGGMDVW        | 3-30   | 6 | 2 | 2 | 0 |
| CARVLSPLYGGMDVW       | 3-33   | 6 | 2 | 2 | 0 |
| CARDYGDYGGLDYW        | 3-30   | 4 | 2 | 2 | 0 |
| CSKDIYSGSYPDYW        | 3-9    | 4 | 2 | 2 | 0 |
| CVTPRGYSYGPFDYW       | 3-21   | 4 | 2 | 2 | 0 |
| CATGGRYGGMDVW         | 3-30   | 6 | 2 | 2 | 0 |
| CARDPVAVAGPFDYW       | 3-30   | 4 | 2 | 2 | 0 |
| CAREGVGATYFDYW        | 3-30   | 4 | 2 | 2 | 0 |
| CARVQGGYGGMDVW        | 3-30   | 6 | 2 | 2 | 0 |
| CAKGYSSSWYFFDYW       | 3-9    | 4 | 2 | 2 | 0 |
| CATPRVYSYGPFDYW       | 3-23   | 4 | 2 | 2 | 0 |
| CARTSGSYSPFDYW        | 3-30-3 | 4 | 2 | 2 | 0 |
| CARDREAVAGPFDYW       | 3-30   | 4 | 2 | 2 | 0 |
| CAREGVGATYFDYW        | 3-33   | 4 | 2 | 2 | 0 |
| CTRTDFWSGYPPDDW       | 3-49   | 4 | 2 | 2 | 0 |

|                     |        |   |   |   |   |
|---------------------|--------|---|---|---|---|
| CAKDVGYSSGLPDYW     | 3-9    | 4 | 2 | 2 | 0 |
| CTRYDFWSGYFSDYW     | 3-49   | 4 | 2 | 2 | 0 |
| CARGYSSYYWYFDLW     | 3-30   | 2 | 2 | 2 | 0 |
| CAREGIVGATGLDYW     | 3-30   | 4 | 2 | 2 | 0 |
| CATLRGGYYYGMDVW     | 3-9    | 6 | 2 | 2 | 0 |
| CASPRSGSYGAFDIW     | 3-30-3 | 3 | 2 | 2 | 0 |
| CARTKSGSYWYFDYW     | 3-30   | 4 | 2 | 2 | 0 |
| CARVRSGSYLSHFDYW    | 3-30   | 4 | 2 | 2 | 0 |
| CARVSSGSYYGWFDYW    | 3-30-3 | 4 | 2 | 2 | 0 |
| CARDRSGSYHGMVDVW    | 3-30   | 6 | 2 | 2 | 0 |
| CASSYSGSYLSAFDIW    | 3-30-3 | 3 | 2 | 2 | 0 |
| CVRAVAGTYYYGMDVW    | 3-30   | 6 | 2 | 2 | 0 |
| CSRSGSGSYGWFDPW     | 3-30-3 | 5 | 2 | 2 | 0 |
| CATSPATVTTGWFDPW    | 1-24   | 5 | 2 | 2 | 0 |
| CARGSYGSYYGMDVW     | 3-30   | 6 | 2 | 2 | 0 |
| CARVYSGSYFSPFDYW    | 3-30-3 | 4 | 2 | 2 | 0 |
| CARVYGGSYLGAFDIW    | 3-30   | 3 | 2 | 2 | 0 |
| CAKTNSGSYYGMDVW     | 3-30   | 6 | 2 | 2 | 0 |
| CAKGPYGSYVVDYW      | 3-9    | 4 | 2 | 2 | 0 |
| CARGPRGYSYGYVDYW    | 3-21   | 4 | 2 | 2 | 0 |
| CAREGDYYYYGMDVW     | 3-33   | 6 | 2 | 2 | 0 |
| CAREGVITGTTGLDYW    | 3-33   | 4 | 2 | 2 | 0 |
| CARVSGGSYGNFDYW     | 3-30-3 | 4 | 2 | 2 | 0 |
| CARVRGGSYWGDFDYW    | 3-30   | 4 | 2 | 2 | 0 |
| CAREGQTTVTTGIDYW    | 3-33   | 4 | 2 | 2 | 0 |
| CATTIVGATSWFDPW     | 1-24   | 5 | 2 | 2 | 0 |
| CARQEDYYDSSGFDYW    | 3-33   | 4 | 2 | 2 | 0 |
| CARTRSGSYLYYFDYW    | 3-30   | 4 | 2 | 2 | 0 |
| CARAYSGSYFNWFDPW    | 3-30-3 | 5 | 2 | 2 | 0 |
| CARDYSGSYLGLFDYW    | 3-30-3 | 4 | 2 | 2 | 0 |
| CARPYSGSYYWWFDPW    | 3-23   | 5 | 2 | 2 | 0 |
| CARDVAVAGDDAFDIW    | 3-33   | 3 | 2 | 2 | 0 |
| CARTRGGGYFDAFDIW    | 3-30-3 | 3 | 2 | 2 | 0 |
| CAKGVSGYYLDAFDIW    | 3-30   | 3 | 2 | 2 | 0 |
| CARTYSGSYRNWFDPW    | 3-33   | 5 | 2 | 2 | 0 |
| CARVPGGSYFGAFDIW    | 3-30-3 | 3 | 2 | 2 | 0 |
| CARVYGGSYIGYFDYW    | 3-30   | 4 | 2 | 2 | 0 |
| CARELDSTSSDFDYW     | 3-30   | 4 | 2 | 2 | 0 |
| CARGSSGNYCYGMDVW    | 3-30   | 6 | 2 | 2 | 0 |
| CARRNSSGWYGDWFDPW   | 2-5    | 5 | 2 | 2 | 0 |
| CARATMIVVVVGAFDIW   | 4-31   | 3 | 2 | 2 | 0 |
| CSKDRPYDYVWGSLDYW   | 3-30   | 4 | 2 | 2 | 0 |
| CAKDWGYDYGDYGPDYW   | 3-30   | 4 | 2 | 2 | 0 |
| CATRYCSGGSCSLFDYW   | 4-4    | 4 | 2 | 2 | 0 |
| CARYDYYDSSGYLDYW    | 1-69   | 4 | 2 | 2 | 0 |
| CTKADCSSTSCQNWFDPW  | 3-9    | 5 | 2 | 2 | 0 |
| CAKVGYSYGYPVYFDYW   | 3-30   | 4 | 2 | 2 | 0 |
| CARVSYDSSGYYYFDYW   | 3-13   | 4 | 2 | 2 | 0 |
| CARGGYSYGYYYGMDVW   | 3-53   | 6 | 2 | 2 | 0 |
| CARSPITMIVVVNAFDIW  | 4-34   | 3 | 2 | 2 | 0 |
| CAREGTYCGGDCYSGLDYW | 3-33   | 4 | 2 | 2 | 0 |
| CARTYYDILTGHNYGMDVW | 2-70   | 6 | 2 | 2 | 0 |
| CARDSYSSSSYYYGMDVW  | 3-7    | 6 | 2 | 2 | 0 |



|                         |        |   |   |   |   |
|-------------------------|--------|---|---|---|---|
| CARGRYSSSWYGVNRWFDPW    | 4-59   | 5 | 2 | 2 | 0 |
| CAKVSGPYCSGGSCYSFYFDYW  | 3-30   | 4 | 2 | 2 | 0 |
| CARGWPSSSWYYYYYGMDVW    | 4-34   | 6 | 2 | 2 | 0 |
| CAKVVGVIYCSGGSCYGGYFDYW | 3-30   | 4 | 2 | 2 | 0 |
| CTRGVPGYW               | 4-34   | 4 | 2 | 1 | 1 |
| CARSDGYNFDYW            | 4-59   | 4 | 2 | 1 | 1 |
| CARDGGVLFDYW            | 3-23   | 4 | 2 | 1 | 1 |
| CARDTSGWYLDYW           | 3-30-3 | 4 | 2 | 1 | 1 |
| CARVLSYYGMDVW           | 3-30-3 | 6 | 2 | 1 | 1 |
| CAGGSYYYGMDVW           | 3-33   | 6 | 2 | 1 | 1 |
| CARDRGYSYGSFDYW         | 3-33   | 4 | 2 | 1 | 1 |
| CARVLSGWYVGFDPW         | 1-69   | 5 | 2 | 1 | 1 |
| CARVYSGSYPAFDIW         | 3-21   | 3 | 2 | 1 | 1 |
| CAKGSWYSSSWYFDYW        | 3-30   | 4 | 2 | 1 | 1 |
| CAKDRSGSYGGYGMVW        | 3-30   | 6 | 2 | 1 | 1 |
| CARGGYSSWYGGYGMVW       | 3-13   | 6 | 2 | 1 | 1 |
| CARGFDYW                | 5-51   | 4 | 1 | 1 | 0 |
| CARGFVLW                | 4-59   | 4 | 1 | 1 | 0 |
| CAKGGDMVW               | 3-30   | 6 | 1 | 1 | 0 |
| CAKVGGYFDYW             | 3-9    | 4 | 1 | 1 | 0 |
| CASWVNWFDPW             | 4-34   | 5 | 1 | 1 | 0 |
| CTSLSAPTIDY             | 3-74   | 4 | 1 | 1 | 0 |
| CPRGLEWELLNW            | 3-33   | 4 | 1 | 1 | 0 |
| CARESGSGLDYW            | 3-30-3 | 4 | 1 | 1 | 0 |
| CARWGGSGLDYW            | 3-30   | 4 | 1 | 1 | 0 |
| CARSVSYFDYW             | 3-53   | 4 | 1 | 1 | 0 |
| CATSFYYYMDVW            | 3-21   | 6 | 1 | 1 | 0 |
| CARGGGDYVDYW            | 3-30-3 | 4 | 1 | 1 | 0 |
| CARDVGGYFDLW            | 3-30   | 2 | 1 | 1 | 0 |
| CARYHGSALDYW            | 3-30-3 | 4 | 1 | 1 | 0 |
| CAKEGIVLLDYW            | 3-30   | 4 | 1 | 1 | 0 |
| CARDSGSYLGWW            | 3-30   | 4 | 1 | 1 | 0 |
| CASLAGSGFDYW            | 3-30-3 | 4 | 1 | 1 | 0 |
| CARYSSGYFDYW            | 3-21   | 4 | 1 | 1 | 0 |
| CATEGLLDAFDIW           | 3-30   | 3 | 1 | 1 | 0 |
| CARVLSGYGFDYW           | 3-30   | 4 | 1 | 1 | 0 |
| CARDPYGGGFDYW           | 3-30-3 | 4 | 1 | 1 | 0 |
| CARDGLSYGLDYW           | 3-30   | 4 | 1 | 1 | 0 |
| CARDSYSSGLDYW           | 3-7    | 4 | 1 | 1 | 0 |
| CARESGSWTIDYW           | 3-30   | 4 | 1 | 1 | 0 |
| CAKVAAGTTDYW            | 3-9    | 4 | 1 | 1 | 0 |
| CAREHGDYGFYW            | 3-7    | 4 | 1 | 1 | 0 |
| CVGELPYYGMDVW           | 3-30   | 6 | 1 | 1 | 0 |
| CARNGGNNWFDPW           | 3-30-3 | 5 | 1 | 1 | 0 |
| CARDGTLEPLDYW           | 1-69   | 4 | 1 | 1 | 0 |
| CGRGYGDYWFDPW           | 3-53   | 5 | 1 | 1 | 0 |
| CARDLYDDAFDIW           | 3-66   | 3 | 1 | 1 | 0 |
| CARRYGVRPFYW            | 2-70   | 4 | 1 | 1 | 0 |
| CARGAGPYGMVW            | 3-11   | 6 | 1 | 1 | 0 |
| CVRARDGYNHFDYW          | 3-30-3 | 4 | 1 | 1 | 0 |
| CAKVSSYGYFDYW           | 3-23   | 4 | 1 | 1 | 0 |
| CATSLWFGELLYW           | 3-30   | 4 | 1 | 1 | 0 |
| CARGSSGYFDYW            | 3-30-3 | 4 | 1 | 1 | 0 |

|                  |        |   |   |   |   |
|------------------|--------|---|---|---|---|
| CAKVYRSGNAFDIW   | 3-23   | 3 | 1 | 1 | 0 |
| CTGSTGYYYGMDVW   | 3-33   | 6 | 1 | 1 | 0 |
| CARSDGYNSYFDYW   | 3-30   | 4 | 1 | 1 | 0 |
| CARWLGGYYGMDVW   | 3-30-3 | 6 | 1 | 1 | 0 |
| CSRDYGDYGGMDVW   | 3-30   | 6 | 1 | 1 | 0 |
| CVREDYGDFGFDYW   | 3-30   | 4 | 1 | 1 | 0 |
| CARDYRFGELGDYW   | 3-33   | 4 | 1 | 1 | 0 |
| CASSSPYYGMDVW    | 3-33   | 6 | 1 | 1 | 0 |
| CAVGLGYYYGMDVW   | 3-23   | 6 | 1 | 1 | 0 |
| CARDWAVGATTDYW   | 3-33   | 4 | 1 | 1 | 0 |
| CARRPVGVTPFDYW   | 5-51   | 4 | 1 | 1 | 0 |
| CAKMYGSGSYIDYW   | 3-9    | 4 | 1 | 1 | 0 |
| CARGGTLYDAFDIW   | 3-30-3 | 3 | 1 | 1 | 0 |
| CARSYSGYVPFDYW   | 2-70   | 4 | 1 | 1 | 0 |
| CARGWGGYFFDYW    | 3-30   | 4 | 1 | 1 | 0 |
| CARTKTGYFFDYW    | 3-30   | 4 | 1 | 1 | 0 |
| CARIMATINAFDIW   | 2-70   | 3 | 1 | 1 | 0 |
| CASTTYYYYYMDVW   | 1-18   | 6 | 1 | 1 | 0 |
| CARDVAVGDAFDSW   | 3-33   | 3 | 1 | 1 | 0 |
| CVRVVAATVSFDYW   | 2-70   | 4 | 1 | 1 | 0 |
| CAKLYGDSPFDYW    | 3-9    | 4 | 1 | 1 | 0 |
| CASGSGSYFFDYW    | 3-30   | 4 | 1 | 1 | 0 |
| CARYTGDYYGMDVW   | 5-51   | 6 | 1 | 1 | 0 |
| CARDGGLAAAFDYW   | 3-33   | 4 | 1 | 1 | 0 |
| CATELLWRYGMDVW   | 3-30   | 6 | 1 | 1 | 0 |
| CAKDPYGDALFDYW   | 3-23   | 4 | 1 | 1 | 0 |
| CARDGGLVRGVVDYW  | 3-33   | 4 | 1 | 1 | 0 |
| CTRDDFRSGYTNYW   | 3-49   | 4 | 1 | 1 | 0 |
| CARELSGWYGFYDW   | 3-33   | 4 | 1 | 1 | 0 |
| CARDRRLAEFFDYW   | 3-33   | 4 | 1 | 1 | 0 |
| CARDGTVTRTFDYW   | 3-33   | 4 | 1 | 1 | 0 |
| CTQDDFWSGYGHYW   | 3-49   | 4 | 1 | 1 | 0 |
| CGRDEYSSGWYFDYW  | 3-33   | 4 | 1 | 1 | 0 |
| CAKGRGYSYGFYDW   | 3-30   | 4 | 1 | 1 | 0 |
| CTTGSGSYLWGFDPW  | 1-24   | 5 | 1 | 1 | 0 |
| CASGYSYGYWYFDYW  | 3-30   | 4 | 1 | 1 | 0 |
| CVLGSYSYTPFDYW   | 3-30   | 4 | 1 | 1 | 0 |
| CARIYSSWPSFDYW   | 2-70   | 4 | 1 | 1 | 0 |
| CARDSRGYSYGFYDW  | 3-33   | 4 | 1 | 1 | 0 |
| CARGGIAVADAFDIW  | 3-30   | 3 | 1 | 1 | 0 |
| CERAVVAAHNWFDPW  | 3-21   | 5 | 1 | 1 | 0 |
| CARGPRSSDYFDYW   | 3-23   | 4 | 1 | 1 | 0 |
| CARDYLGYSYGSYDW  | 3-7    | 4 | 1 | 1 | 0 |
| CARVLVVNYGMDVW   | 3-30   | 6 | 1 | 1 | 0 |
| CARDSIVSGWLFYDW  | 3-33   | 4 | 1 | 1 | 0 |
| CARQLTYYYYGMDVW  | 3-30   | 6 | 1 | 1 | 0 |
| CTRYDFWGGYVVDYW  | 3-49   | 4 | 1 | 1 | 0 |
| CARTSSGYYSKFDYW  | 3-30   | 4 | 1 | 1 | 0 |
| CARVGGIAVAGLDYW  | 3-30   | 4 | 1 | 1 | 0 |
| CARDLSGSYTYFDYW  | 3-30   | 4 | 1 | 1 | 0 |
| CATELLYYYGMDVW   | 3-33   | 6 | 1 | 1 | 0 |
| CARDQRSSGWYVVDYW | 3-33   | 4 | 1 | 1 | 0 |
| CARTWAAAGLGADYW  | 2-70   | 4 | 1 | 1 | 0 |

|                  |        |   |   |   |   |
|------------------|--------|---|---|---|---|
| CARSRGGYSPFDYW   | 3-30-3 | 4 | 1 | 1 | 0 |
| CAREVAALDAFDIW   | 3-30   | 3 | 1 | 1 | 0 |
| CARARGGSYSYFDYW  | 3-30   | 4 | 1 | 1 | 0 |
| CARGYGDYVPNFDYW  | 4-34   | 4 | 1 | 1 | 0 |
| CAREGVTATVYFDYW  | 3-74   | 4 | 1 | 1 | 0 |
| CARESIVVPAADYW   | 3-74   | 4 | 1 | 1 | 0 |
| CSRNYDSSDAFDIW   | 3-30   | 3 | 1 | 1 | 0 |
| CARTLVLSYYGMDVW  | 3-33   | 6 | 1 | 1 | 0 |
| CARVLVLYYYGMDVW  | 3-30-3 | 6 | 1 | 1 | 0 |
| CATNDYYYYYYMDVW  | 3-33   | 6 | 1 | 1 | 0 |
| CVRDMSGSYGPFYDW  | 3-30   | 4 | 1 | 1 | 0 |
| CATVHSGSYLGYFDYW | 3-30   | 4 | 1 | 1 | 0 |
| CASAGSGSYRGWFDPW | 3-30   | 5 | 1 | 1 | 0 |
| CPRGYSYFSAFDIW   | 3-30   | 3 | 1 | 1 | 0 |
| CARVYSGSYSHFDYW  | 3-30   | 4 | 1 | 1 | 0 |
| CARTWSGSYLSWFDPW | 3-30-3 | 5 | 1 | 1 | 0 |
| CVRSYSGSYFSWFDPW | 3-30   | 5 | 1 | 1 | 0 |
| CTRYSGSYYYGMDVW  | 3-30-3 | 6 | 1 | 1 | 0 |
| CATTRGGSYGAFDIW  | 3-30   | 3 | 1 | 1 | 0 |
| CVRGVGGYYYGMDVW  | 3-30-3 | 6 | 1 | 1 | 0 |
| CATVPIFGVVSDFPW  | 1-24   | 5 | 1 | 1 | 0 |
| CERETGDSSSYFDYW  | 3-30   | 4 | 1 | 1 | 0 |
| CARVVGANYYYGMDVW | 3-30   | 6 | 1 | 1 | 0 |
| CASVSSGYYYGAFDYW | 3-30   | 4 | 1 | 1 | 0 |
| CARSVYGDYYYYMDVW | 4-59   | 6 | 1 | 1 | 0 |
| CARTYSGSYTPFDYW  | 3-30-3 | 4 | 1 | 1 | 0 |
| CSRVSVVYYYGMDVW  | 3-48   | 6 | 1 | 1 | 0 |
| CARESIVVHDAFDIW  | 3-30   | 3 | 1 | 1 | 0 |
| CARTYYYDSSGYWDYW | 3-30   | 4 | 1 | 1 | 0 |
| CATTYSGSYKGYFDYW | 3-30   | 4 | 1 | 1 | 0 |
| CATSPAALRSNWFDPW | 1-24   | 5 | 1 | 1 | 0 |
| CAKDPVGATYDALDIW | 3-23   | 3 | 1 | 1 | 0 |
| CARTYSGIYLAPFDYW | 3-30   | 4 | 1 | 1 | 0 |
| CARARGGYSRPFDYW  | 3-30   | 4 | 1 | 1 | 0 |
| CARSGSGSYFAYFDYW | 3-30   | 4 | 1 | 1 | 0 |
| CARGWSGSYRTYFDYW | 3-30-3 | 4 | 1 | 1 | 0 |
| CATGPVVAATWFDPW  | 1-24   | 5 | 1 | 1 | 0 |
| CSRPGSGSYLSWFDPW | 3-30   | 5 | 1 | 1 | 0 |
| CATSAVAGTWGWFDPW | 1-24   | 5 | 1 | 1 | 0 |
| CATSPAIAVAGWFDPW | 1-24   | 5 | 1 | 1 | 0 |
| CARHWDNFWSGYHYW  | 5-51   | 4 | 1 | 1 | 0 |
| CATGPVAGTSNWFDPW | 1-24   | 5 | 1 | 1 | 0 |
| CARVLSGSYWGWFDPW | 3-30   | 5 | 1 | 1 | 0 |
| CPRALWGNYYYGMDVW | 3-30-3 | 6 | 1 | 1 | 0 |
| CARSRGGSYSNAFDIW | 3-30   | 3 | 1 | 1 | 0 |
| CARTSRGSYYDAFDIW | 3-30   | 3 | 1 | 1 | 0 |
| CARGSSGTYYYGMDGW | 3-30   | 6 | 1 | 1 | 0 |
| CARVSYDSLTYGYDYW | 3-13   | 4 | 1 | 1 | 0 |
| CARTNIAAAGTAVDYW | 2-70   | 4 | 1 | 1 | 0 |
| CARTSGGSYRGWFDPW | 3-30-3 | 5 | 1 | 1 | 0 |
| CASSNSGSYWGAFDIW | 3-30   | 3 | 1 | 1 | 0 |
| CARDVGSWYGYFDYW  | 3-33   | 4 | 1 | 1 | 0 |
| CATGPTGSYYDYFDYW | 3-30   | 4 | 1 | 1 | 0 |

|                   |        |   |   |   |   |
|-------------------|--------|---|---|---|---|
| CASPYSGSYYSHFDYW  | 3-30   | 4 | 1 | 1 | 0 |
| CARSSRGSYLNWFDPW  | 3-30   | 5 | 1 | 1 | 0 |
| CARELIAAAGYYFDYW  | 3-33   | 4 | 1 | 1 | 0 |
| CARSRSGSYSSAFDYW  | 3-30   | 4 | 1 | 1 | 0 |
| CATSEVAGPLNWFDPW  | 1-24   | 5 | 1 | 1 | 0 |
| CPRGYSGSYYEYFQHW  | 3-30   | 1 | 1 | 1 | 0 |
| CARVGGGSYFNWFDPW  | 3-30-3 | 5 | 1 | 1 | 0 |
| CASPRGGSYYGEFDYW  | 3-30-3 | 4 | 1 | 1 | 0 |
| CARDLSGSYYGLDVW   | 3-30-3 | 6 | 1 | 1 | 0 |
| CARDSSGSYYGPNDYW  | 3-30-3 | 4 | 1 | 1 | 0 |
| CARVYSGSYRGFFDYW  | 3-33   | 4 | 1 | 1 | 0 |
| CARVTYGNYYGMDVW   | 3-30   | 6 | 1 | 1 | 0 |
| CATGPPFGVVSWFDPW  | 1-24   | 5 | 1 | 1 | 0 |
| CARVHSGSYGDFDYW   | 3-30-3 | 4 | 1 | 1 | 0 |
| CARPYSGSYWSYVDYW  | 3-30-3 | 4 | 1 | 1 | 0 |
| CARSYSGSYHAFDIW   | 3-33   | 3 | 1 | 1 | 0 |
| CAKTLSGSYSPFYW    | 3-30   | 4 | 1 | 1 | 0 |
| CARPYSGSYFAQFDYW  | 3-30-3 | 4 | 1 | 1 | 0 |
| CANPYSGSYRDAFDIW  | 3-30   | 3 | 1 | 1 | 0 |
| CARAYSGSYYGMDVW   | 3-53   | 6 | 1 | 1 | 0 |
| CARGRGGYHDAFDIW   | 3-30   | 3 | 1 | 1 | 0 |
| CVTTTIFGVKGFDPW   | 1-24   | 5 | 1 | 1 | 0 |
| CARGTRGSYYYGMDVW  | 3-30-3 | 6 | 1 | 1 | 0 |
| CARDLVGAAYYGMDVW  | 3-33   | 6 | 1 | 1 | 0 |
| CARVTGANYYYGMDVW  | 3-30   | 6 | 1 | 1 | 0 |
| CARSKGGYYPFDYW    | 3-30   | 4 | 1 | 1 | 0 |
| CARTYSGSYSYFDDW   | 3-30-3 | 4 | 1 | 1 | 0 |
| CARVYSGSYRGHFDYW  | 3-30   | 4 | 1 | 1 | 0 |
| CAKGKMGYYYGMDVW   | 3-30   | 6 | 1 | 1 | 0 |
| CARTNGGGYYYGMDVW  | 3-33   | 6 | 1 | 1 | 0 |
| CASASGGNYYYGMDVW  | 3-30-3 | 6 | 1 | 1 | 0 |
| CARGWSSGWSYFDYW   | 3-53   | 4 | 1 | 1 | 0 |
| CARGLRFLEWYFDYW   | 4-34   | 4 | 1 | 1 | 0 |
| CATASVFGVANWFDPW  | 1-24   | 5 | 1 | 1 | 0 |
| CARSRSGSYTSWFDPW  | 3-30-3 | 5 | 1 | 1 | 0 |
| CARVSSGSYRSAFDIW  | 3-30-3 | 3 | 1 | 1 | 0 |
| CARGFGGSYYYGMDVW  | 3-53   | 6 | 1 | 1 | 0 |
| CARSLGGSYYVAFDIW  | 3-30   | 3 | 1 | 1 | 0 |
| CARTSGSYYYYFGMDVW | 4-59   | 6 | 1 | 1 | 0 |
| CARDTYDILTGYLYW   | 3-21   | 4 | 1 | 1 | 0 |
| CARGVDLYYYYGMDVW  | 4-34   | 6 | 1 | 1 | 0 |
| CARSGYYYDSSGYSYD  | 3-21   | 4 | 1 | 1 | 0 |
| CARRYGYYYYGMDVW   | 4-39   | 6 | 1 | 1 | 0 |
| CATPRYYYDSSGTFDYW | 3-23   | 4 | 1 | 1 | 0 |
| CAKFADYYDSSGYDYW  | 3-9    | 4 | 1 | 1 | 0 |
| CARDTNYDILTGYYSY  | 3-21   | 4 | 1 | 1 | 0 |
| CAREGQIAVAGTGLDYW | 3-33   | 4 | 1 | 1 | 0 |
| CATSPMAAAGNWFDPW  | 1-24   | 5 | 1 | 1 | 0 |
| CARDVDASGYYYGMDVW | 3-7    | 6 | 1 | 1 | 0 |
| CATGGGYYYYYGMVW   | 3-30   | 6 | 1 | 1 | 0 |
| CARDLAVAGTSEYFQHW | 3-33   | 1 | 1 | 1 | 0 |
| CAREVIAVAGSNWFDPW | 3-30   | 5 | 1 | 1 | 0 |
| CARESLYGDYGGAFDIW | 3-33   | 3 | 1 | 1 | 0 |

|                      |        |   |   |   |   |
|----------------------|--------|---|---|---|---|
| CARAGGSGSYGWFDPW     | 3-30-3 | 5 | 1 | 1 | 0 |
| CARVGRITFGVVTNFDYW   | 4-31   | 4 | 1 | 1 | 0 |
| CARRGYDSSGYYYFDYW    | 5-51   | 4 | 1 | 1 | 0 |
| CAREYYDSSGYPRDYW     | 1-18   | 4 | 1 | 1 | 0 |
| CATSPSIAAAGNNWFDPW   | 1-24   | 5 | 1 | 1 | 0 |
| CSKDYDSSGYSDAFDIW    | 3-23   | 3 | 1 | 1 | 0 |
| CATGPYCGGDCYGAFDIW   | 1-69   | 3 | 1 | 1 | 0 |
| CARSNYDFWSGYLPDFYW   | 3-7    | 4 | 1 | 1 | 0 |
| CVRNYDILTGYSDAFDIW   | 3-53   | 3 | 1 | 1 | 0 |
| CAREGYSSWSLYYFDYW    | 3-33   | 4 | 1 | 1 | 0 |
| CARDVFYDFWSGYFDYW    | 1-3    | 4 | 1 | 1 | 0 |
| CAKNGYSYGGYFDYW      | 3-30   | 4 | 1 | 1 | 0 |
| CAKDSNGSGSYHDAFDIW   | 3-23   | 3 | 1 | 1 | 0 |
| CARASYDSSGYAYFDYW    | 3-13   | 4 | 1 | 1 | 0 |
| CAREVDIVVPAAPFDYW    | 1-46   | 4 | 1 | 1 | 0 |
| CASGAVAGYYYYGMDVW    | 3-21   | 6 | 1 | 1 | 0 |
| CARDDYDVWGSYSTDYW    | 3-30   | 4 | 1 | 1 | 0 |
| CAKDRYYDSSGYFDYW     | 3-23   | 4 | 1 | 1 | 0 |
| CARSYYDILTGYLEAFDIW  | 2-5    | 3 | 1 | 1 | 0 |
| CARIPYDILTGSYGMDVW   | 2-70   | 6 | 1 | 1 | 0 |
| CATIAAAGTHYYYYGMDVW  | 3-48   | 6 | 1 | 1 | 0 |
| CASDYDSSGYNDWFDPW    | 3-30   | 5 | 1 | 1 | 0 |
| CTDRLGATYYYYGMDVW    | 3-15   | 6 | 1 | 1 | 0 |
| CSRDYDSSGYNNWFDPC    | 3-30-3 | 5 | 1 | 1 | 0 |
| CARTHYGGNYYYYGMDVW   | 3-13   | 6 | 1 | 1 | 0 |
| CARYCSSTSCYTDDAFDIW  | 4-39   | 3 | 1 | 1 | 0 |
| CARGGYSYGSYYYGMDVW   | 3-53   | 6 | 1 | 1 | 0 |
| CARVKRITIFGVVTHFDYW  | 4-59   | 4 | 1 | 1 | 0 |
| CARGYDILTGYYREFDYW   | 2-70   | 4 | 1 | 1 | 0 |
| CATNFAYCGGDCYSRFDYW  | 1-24   | 4 | 1 | 1 | 0 |
| CARGRGIQLWNYGMDVW    | 4-31   | 6 | 1 | 1 | 0 |
| CATTSPYCSSTSCPRWFDPW | 1-24   | 5 | 1 | 1 | 0 |
| CSRGYSSSWYGVAEYFQHW  | 4-34   | 1 | 1 | 1 | 0 |
| CATDLYCSGGSCYSFGMDVW | 3-23   | 6 | 1 | 1 | 0 |
| CATLAAAGPEWYYYGMDVW  | 3-21   | 6 | 1 | 1 | 0 |
| CVRRRYSSSWPDYYYGMDVW | 5-51   | 6 | 1 | 1 | 0 |
| CARSYCSSTSCYGYMDVW   | 4-59   | 6 | 1 | 1 | 0 |
| CARGGLAVAGTYGVDVW    | 3-21   | 6 | 1 | 1 | 0 |
| CARDPDYDSSGYVGFYDW   | 3-30-3 | 4 | 1 | 1 | 0 |
| CARLTTVTNYYYYGMDVW   | 1-69   | 6 | 1 | 1 | 0 |
| CARGRYSSSWYGVRNWFDPW | 4-31   | 5 | 1 | 1 | 0 |
| CARVGGYCSSTSCYFDYW   | 1-18   | 4 | 1 | 1 | 0 |
| CATVGVYCTNGVCSNWFDPW | 1-24   | 5 | 1 | 1 | 0 |
| CARDLTYDSSGWGHFDYW   | 3-30   | 4 | 1 | 1 | 0 |
| CAREVYDSSGYEDWFDPW   | 3-74   | 5 | 1 | 1 | 0 |
| CARGYWNVRYGMDVW      | 1-69   | 6 | 1 | 1 | 0 |
| CARGTTVTLFYGMDVW     | 4-39   | 6 | 1 | 1 | 0 |
| CVRGIVVPAAHYYYGMDVW  | 1-18   | 6 | 1 | 1 | 0 |
| CARHPDIAVAGYYYGMDVW  | 4-59   | 6 | 1 | 1 | 0 |
| CARWGWGSGSPNYYYGMDVW | 1-69   | 6 | 1 | 1 | 0 |
| CARSGAGYSYGYGMDVW    | 1-69   | 6 | 1 | 1 | 0 |
| CARGRWFCELLSYGMDVW   | 4-4    | 6 | 1 | 1 | 0 |
| CARVGLGYCSSTSCYAFDIW | 4-39   | 3 | 1 | 1 | 0 |

## Supplementary Material

|                          |        |   |   |   |   |
|--------------------------|--------|---|---|---|---|
| CARESGGYCSGGSCPWFDPW     | 1-46   | 5 | 1 | 1 | 0 |
| CARGRWFGEELLSYYYYGMDVW   | 4-31   | 6 | 1 | 1 | 0 |
| CARVGLRYFDWQAYYYGMDVW    | 4-39   | 6 | 1 | 1 | 0 |
| CARGGVYYYDSSGYLDAFDIW    | 1-2    | 3 | 1 | 1 | 0 |
| CARGRIAAAGLCNYYYYGMDVW   | 4-34   | 6 | 1 | 1 | 0 |
| CVRGRRITIFGVVIDSFGMDVW   | 4-34   | 6 | 1 | 1 | 0 |
| CARVTVLRYFDWSYYYYGMDVW   | 4-31   | 6 | 1 | 1 | 0 |
| CARDSRFWEWLLSYYYYYMDVW   | 3-21   | 6 | 1 | 1 | 0 |
| CARVTTYDSSGYPFYWFYDLW    | 3-13   | 2 | 1 | 1 | 0 |
| CARNGLYYDSSGYLDAFDIW     | 3-23   | 3 | 1 | 1 | 0 |
| CARTGVLRYFDWSYYYYGMDVW   | 4-61   | 6 | 1 | 1 | 0 |
| CARVPLLRYFDWTTYYYGMDVW   | 4-59   | 6 | 1 | 1 | 0 |
| CARVGLRYFDWLLHYYGMDVW    | 4-39   | 6 | 1 | 1 | 0 |
| CAKVVGPYCSGGSCYSGQLDYW   | 3-30   | 4 | 1 | 1 | 0 |
| CARGGYGSGSYNNYYYYMDVW    | 1-69   | 6 | 1 | 1 | 0 |
| CARDSVLRFDWLPYYGMDVW     | 4-61   | 6 | 1 | 1 | 0 |
| CARDSYSSSWLGSYYYYGMDVW   | 3-7    | 6 | 1 | 1 | 0 |
| CARDRYCSSTSCYRDYYYGMDVW  | 1-18   | 6 | 1 | 1 | 0 |
| CARGWIVVPAATYYYYGMDVW    | 4-34   | 6 | 1 | 1 | 0 |
| CARDRYCSGGSCVYYYYGMDVW   | 1-18   | 6 | 1 | 1 | 0 |
| CARVSYSSSWYWGDIYYGMDVW   | 1-69   | 6 | 1 | 1 | 0 |
| CARDTYCSGGSCYYYYYGMDVW   | 3-7    | 6 | 1 | 1 | 0 |
| CARVWGAGYSSGWYYYYYMDVW   | 4-59   | 6 | 1 | 1 | 0 |
| CARDVSSSWYSSGWYYYYYMDVW  | 3-7    | 6 | 1 | 1 | 0 |
| CAKMGGGPYCSGGSCYSNYFDYW  | 3-30   | 4 | 1 | 1 | 0 |
| CARGYTMVRGVIPRYYYYYMDVW  | 3-13   | 6 | 1 | 1 | 0 |
| CARVGYCSSTSCYVPPYYGMDVW  | 1-2    | 6 | 1 | 1 | 0 |
| CARDVDIVVPAATNYYYYGMDVW  | 3-21   | 6 | 1 | 1 | 0 |
| CARDVTTYDILTGYYPQYYGMDVW | 3-33   | 6 | 1 | 1 | 0 |
| CARHLYYDSSGYPPYYGMDVW    | 3-30   | 6 | 1 | 1 | 0 |
| CARYQYYDSSGYPTPYGMDVW    | 3-30-3 | 6 | 1 | 1 | 0 |
| CARVGGGMDVW              | 1-46   | 6 | 1 | 0 | 1 |
| CVKERQWLAYFDYW           | 3-30   | 4 | 1 | 0 | 1 |
| CARGRYDSSGLDYW           | 3-74   | 4 | 1 | 0 | 1 |
| CARELVAGYYGMDVW          | 3-30   | 6 | 1 | 0 | 1 |
| CARDSYSSSWYFDYW          | 3-30   | 4 | 1 | 0 | 1 |
| CARGRGSYYGWFPW           | 3-30   | 5 | 1 | 0 | 1 |
| CARGYSSGYYYFDYW          | 3-13   | 4 | 1 | 0 | 1 |
| CARDPSSSWYIFDYW          | 3-30   | 4 | 1 | 0 | 1 |
| CASDPYYDSSGLLDYW         | 3-21   | 4 | 1 | 0 | 1 |
| CARSYDILTGYLYFDYW        | 3-30   | 4 | 1 | 0 | 1 |
| CARVRYDSSGYSPFDYW        | 1-69   | 4 | 1 | 0 | 1 |
| CARDLAVAATYYYYGMDVW      | 3-7    | 6 | 1 | 0 | 1 |
| CARDSGVAAAGNYYYYGMDVW    | 3-7    | 6 | 1 | 0 | 1 |
